# Supplementary material
Source: Research Square preprint supplement (doi:10.21203/rs.3.rs-9323391/v1)
Supplement: Supplementary file 1 [file c8f51bb2e19f36ab3d2eb73a.docx]

| Duration of COVID‑19‑Related School Closures (UNESCO administrative data) by Country. | | | |
| --- | --- | --- | --- |
| Country | Fully closed (days) | Partially closed (days) | Total closure duration (days) |
| Brazil | 267 | 288 | 555 |
| Hong Kong | — | — | 239* |
| Hungary | 143 | 129 | 272 |
| Ireland | 154 | 25 | 179 |
| Macao | — | — | 239* |
| Mexico | 374 | 194 | 568 |
| Netherlands | 81 | 134 | 215 |
| New Zealand | 54 | 135 | 189 |
| Panama | 386 | 256 | 642 |
| Saudi Arabia | 349 | 130 | 479 |
| Slovenia | 145 | 186 | 331 |
| Spain | 70 | 35 | 105 |
| United Arab Emirates | 125 | 338 | 463 |
| Mean (SD) | - | - | 344.3 (175.2) |
| *Hong Kong and Macao are not listed separately in the UNESCO database. The value of 239 days (corresponding to mainland China) was used as a proxy in sensitivity analyses, as described in the Methods section. SD: Standard Deviation. | | | |

| **Supplementary Table 1.** Country‑specific sample characteristics for psychosomatic symptoms and life satisfaction (PISA 2022). | | | | | | |
| --- | --- | --- | --- | --- | --- | --- |
|  | **Brazil (444 schools)** | | **Hong Kong (126 schools)** | | **Hungary (236 schools)** | |
|  | **Psychosomatic symptoms sample**  **(N= 5,157)** | **Life satisfaction sample**  **(N= 5,030)** | **Psychosomatic symptoms sample**  **(N= 4,845)** | **Life satisfaction sample**  **(N= 4,838)** | **Psychosomatic symptoms sample**  **(N= 4,683)** | **Life satisfaction sample**  **(N= 4,661)** |
|  | **N (%)** | **N (%)** | **N (%)** | **N (%)** | **N (%)** | **N (%)** |
| *Student-level* |  |  |  |  |  |  |
| Immigrant background (ref. Native-born) |  |  |  |  |  |  |
| 2nd generation | 16 (0.3) | 16 (0.3) | 1,522 (31.4) | 1,521 (31.4) | 64 (1.4) | 63 (1.4) |
| 1st generation | 12 (0.2) | 12 (0.2) | 345 (7.1) | 344 (7.1) | 39 (0.8) | 39 (0.8) |
| Sex (female) | 2,683 (52.0) | 2,615 (52.0) | 2,421 (50.0) | 2,420 (50.0) | 2,375 (50.7) | 2,363 (50.7) |
| Age (in years; mean, SD) | 15.87 (0.28) | 15.87 (0.28) | 15.81 (0.29) | 15.81 (0.29) | 15.73 (0.29) | 15.73 (0.29) |
| ESCS (PISA WLE index; mean, SDa) | −0.82 (1.10) | −0.82 (1.10) | −0.43 (1.00) | −0.43 (1.00) | 0.09 (0.92) | 0.10 (0.92) |
| Grade repetition (yes) | 834 (16.2) | 807 (16.0) | 511 (10.5) | 510 (10.5) | 174 (3.7) | 171 (3.7) |
| Language spoken at home  (language of the test country; yes) | 5,082 (98.5) | 4,956 (98.5) | 4,084 (84.3) | 4,077 (84.3) | 4,589 (98.0) | 4,568 (98.0) |
| *School-level* |  |  |  |  |  |  |
| COVID-19 school closure (yes) | 3,456 (67.0) | 3,375 (67.1) | 1,243 (25.7) | 1,241 (25.7) | 986 (21.1) | 983 (21.1) |
| Teacher support (PISA WLE index; mean, SDa) | 0.26 (0.46) | 0.26 (0.46) | 0.13 (0.25) | 0.13 (0.25) | −0.23 (0.39) | −0.23 (0.39) |
| Disciplinary climate (PISA WLE index; mean, SDa) | −0.37 (0.39) | −0.37 (0.39) | 0.37 (0.29) | 0.37 (0.29) | 0.07 (0.46) | 0.07 (0.46) |
| *Country-level* |  |  |  |  |  |  |
| OECD membership (yes) | 0 (0.0) | 0 (0.0) | 0 (0.0) | 0 (0.0) | 4,683 (100.0) | 4,661 (100.0) |
| **Supplementary Table 1 (continued).** Country‑specific sample characteristics for psychosomatic symptoms and life satisfaction (PISA 2022). | | | | | | |
|  | **Ireland (141 schools)** | | **Macao (44 schools)** | | **Mexico (247 schools)** | |
|  | **Psychosomatic symptoms sample**  **(N= 4,665)** | **Life satisfaction sample**  **(N= 4,654)** | **Psychosomatic symptoms sample**  **(N= 4,034)** | **Life satisfaction sample**  **(N= 4,029)** | **Psychosomatic symptoms sample**  **(N= 4,621)** | **Life satisfaction sample**  **(N= 4,613)** |
|  | **N (%)** | **N (%)** | **N (%)** | **N (%)** | **N (%)** | **N (%)** |
| *Student-level* |  |  |  |  |  |  |
| Immigrant background (ref. Native-born) |  |  |  |  |  |  |
| 2nd generation | 440 (9.4) | 440 (9.5) | 1,547 (38.3) | 1,546 (38.4) | 24 (0.5) | 24 (0.5) |
| 1st generation | 323 (6.9) | 322 (6.9) | 897 (22.2) | 897 (22.3) | 28 (0.6) | 28 (0.6) |
| Sex (female) | 2,377 (51.0) | 2,374 (51.0) | 1,954 (48.4) | 1,952 (48.4) | 2,364 (51.2) | 2,362 (51.2) |
| Age (in years; mean, SD) | 15.74 (0.29) | 15.74 (0.29) | 15.80 (0.29) | 15.80 (0.29) | 15.83 (0.29) | 15.83 (0.29) |
| ESCS (PISA WLE index; mean, SDa) | 0.37 (0.79) | 0.37 (0.79) | −0.45 (0.91) | −0.45 (0.91) | −0.79 (1.13) | −0.79 (1.13) |
| Grade repetition (yes) | 153 (3.3) | 153 (3.3) | 860 (21.3) | 860 (21.3) | 420 (9.1) | 420 (9.1) |
| Language spoken at home  (language of the test country; yes) | 4,150 (89.0) | 4,140 (89.0) | 3,112 (77.1) | 3,107 (77.1) | 4,533 (98.1) | 4,525 (98.1) |
| *School-level* |  |  |  |  |  |  |
| COVID-19 school closure (yes) | 1,971 (42.3) | 1,965 (42.2) | 366 (9.1) | 366 (9.1) | 2,584 (55.9) | 2,580 (55.9) |
| Teacher support (PISA WLE index; mean, SDa) | 0.08 (0.31) | 0.08 (0.31) | 0.00 (0.21) | 0.00 (0.21) | 0.40 (0.39) | 0.40 (0.39) |
| Disciplinary climate (PISA WLE index; mean, SDa) | 0.17 (0.29) | 0.17 (0.29) | 0.38 (0.32) | 0.38 (0.32) | 0.20 (0.39) | 0.20 (0.39) |
| *Country-level* |  |  |  |  |  |  |
| OECD membership (yes) | 4,665 (100.0) | 4,654 (100.0) | 0 (0.0) | 0 (0.0) | 4,621 (100.0) | 4,613 (100.0) |
| **Supplementary Table 1 (continued).** Country‑specific sample characteristics for psychosomatic symptoms and life satisfaction (PISA 2022). | | | | | | |
|  | **Netherlands (142 schools)** | | **New Zealand (152 schools)** | | **Panama (108 schools)** | |
|  | **Psychosomatic symptoms sample**  **(N= 3,801)** | **Life satisfaction sample**  **(N= 3,785)** | **Psychosomatic symptoms sample**  **(N= 3,246)** | **Life satisfaction sample**  **(N= 3,217)** | **Psychosomatic symptoms sample**  **(N= 1,261)** | **Life satisfaction sample**  **(N= 1,245)** |
|  | **N (%)** | **N (%)** | **N (%)** | **N (%)** | **N (%)** | **N (%)** |
| *Student-level* |  |  |  |  |  |  |
| Immigrant background (ref. Native-born) |  |  |  |  |  |  |
| 2nd generation | 315 (8.3) | 313 (8.3) | 457 (14.1) | 453 (14.1) | 22 (1.7) | 21 (1.7) |
| 1st generation | 137 (3.6) | 137 (3.6) | 446 (13.7) | 441 (13.7) | 63 (5.0) | 61 (4.9) |
| Sex (female) | 1,843 (48.5) | 1,836 (48.5) | 1,660 (51.1) | 1,644 (51.1) | 630 (50.0) | 620 (49.8) |
| Age (in years; mean, SD) | 15.78 (0.29) | 15.78 (0.29) | 15.80 (0.29) | 15.80 (0.29) | 15.84 (0.27) | 15.84 (0.27) |
| ESCS (PISA WLE index; mean, SDa) | 0.32 (0.82) | 0.32 (0.82) | 0.31 (0.88) | 0.31 (0.88) | −0.57 (1.23) | −0.56 (1.23) |
| Grade repetition (yes) | 766 (20.2) | 761 (20.1) | 116 (3.6) | 116 (3.6) | 253 (20.1) | 248 (19.9) |
| Language spoken at home  (language of the test country; yes) | 3,412 (89.8) | 3,399 (89.8) | 2,730 (84.1) | 2,706 (84.1) | 1,181 (93.7) | 1,168 (93.8) |
| *School-level* |  |  |  |  |  |  |
| COVID-19 school closure (yes) | 1,099 (28.9) | 1,092 (28.9) | 335 (10.3) | 330 (10.3) | 658 (52.2) | 651 (52.3) |
| Teacher support (PISA WLE index; mean, SDa) | −0.39 (0.27) | −0.39 (0.27) | 0.11 (0.34) | 0.11 (0.34) | 0.44 (0.49) | 0.44 (0.49) |
| **Supplementary Table 1 (continued).** Country‑specific sample characteristics for psychosomatic symptoms and life satisfaction (PISA 2022). | | | | | | |
|  | **Saudi Arabia (156 schools)** | | **Slovenia (289 schools)** | | **Spain (897 schools)** | |
|  | **Psychosomatic symptoms sample**  **(N= 4,884)** | **Life satisfaction sample**  **(N= 4,793)** | **Psychosomatic symptoms sample**  **(N= 5,438)** | **Life satisfaction sample**  **(N= 5,415)** | **Psychosomatic symptoms sample**  **(N= 24,169)** | **Life satisfaction sample**  **(N= 24,037)** |
|  | **N (%)** | **N (%)** | **N (%)** | **N (%)** | **N (%)** | **N (%)** |
| *Student-level* |  |  |  |  |  |  |
| Immigrant background (ref. Native-born) |  |  |  |  |  |  |
| 2nd generation | 233 (4.8) | 227 (4.7) | 203 (3.7) | 202 (3.7) | 1,820 (7.5) | 1,799 (7.5) |
| 1st generation | 308 (6.3) | 302 (6.3) | 261 (4.8) | 260 (4.8) | 1,189 (4.9) | 1,179 (4.9) |
| Sex (female) | 2,911 (59.6) | 2,884 (60.2) | 2,713 (49.9) | 2,705 (50.0) | 12,083 (50.0) | 12,008 (50.0) |
| Age (in years; mean, SD) | 15.88 (0.28) | 15.88 (0.28) | 15.74 (0.28) | 15.74 (0.28) | 15.80 (0.29) | 15.80 (0.29) |
| ESCS (PISA WLE index; mean, SDa) | −0.27 (1.04) | −0.27 (1.04) | 0.20 (0.82) | 0.20 (0.82) | 0.06 (0.95) | 0.07 (0.95) |
| Grade repetition (yes) | 272 (5.6) | 265 (5.5) | 61 (1.1) | 61 (1.1) | 3,948 (16.3) | 3,906 (16.2) |
| Language spoken at home  (language of the test country; yes) | 4,658 (95.4) | 4,576 (95.5) | 4,896 (90.0) | 4,878 (90.1) | 20,687 (85.6) | 20,573 (85.6) |
| *School-level* |  |  |  |  |  |  |
| COVID-19 school closure (yes) | 2,248 (46.0) | 2,200 (45.9) | 1,219 (22.4) | 1,213 (22.4) | 3,782 (15.6) | 3,763 (15.7) |
| Teacher support (PISA WLE index; mean, SDa) | 0.53 (0.38) | 0.53 (0.38) | −0.40 (0.45) | −0.40 (0.45) | 0.05 (0.39) | 0.05 (0.39) |
| Disciplinary climate (PISA WLE index; mean, SDa) | 0.44 (0.37) | 0.45 (0.37) | 0.05 (0.46) | 0.05 (0.45) | −0.02 (0.37) | −0.02 (0.37) |
| *Country-level* |  |  |  |  |  |  |
| OECD membership (yes) | 0 (0.0) | 0 (0.0) | 5,438 (100.0) | 5,415 (100.0) | 24,169 (100.0) | 24,037 (100.0) |
| **Supplementary Table 1 (continued).** Country‑specific sample characteristics for psychosomatic symptoms and life satisfaction (PISA 2022). | | | | | | |
|  | **United Arab Emirates (730 schools)** | |  | |  | |
|  | **Psychosomatic symptoms sample**  **(N= 17,626)** | **Life satisfaction sample**  **(N= 17,515)** |  |  |  |  |
|  | **N (%)** | **N (%)** |  |  |  |  |
| *Student-level* |  |  |  |  |  |  |
| Immigrant background (ref. Native-born) |  |  |  |  |  |  |
| 2nd generation | 3,564 (20.2) | 3,547 (20.3) |  |  |  |  |
| 1st generation | 6,569 (37.3) | 6,531 (37.3) |  |  |  |  |
| Sex (female) | 9,558 (54.2) | 9,511 (54.3) |  |  |  |  |
| Age (in years; mean, SD) | 15.85 (0.29) | 15.85 (0.29) |  |  |  |  |
| ESCS (PISA WLE index; mean, SDa) | 0.35 (0.71) | 0.35 (0.71) |  |  |  |  |
| Grade repetition (yes) | 1,420 (8.1) | 1,405 (8.0) |  |  |  |  |
| Language spoken at home  (language of the test country; yes) | 10,261 (58.2) | 10,182 (58.1) |  |  |  |  |
| *School-level* |  |  |  |  |  |  |
| COVID-19 school closure (yes) | 9,165 (52.0) | 9,109 (52.0) |  |  |  |  |
| Teacher support (PISA WLE index; mean, SDa) | 0.28 (0.40) | 0.28 (0.40) |  |  |  |  |
| Disciplinary climate (PISA WLE index; mean, SDa) | 0.23 (0.40) | 0.23 (0.40) |  |  |  |  |
| *Country-level* |  |  |  |  |  |  |
| OECD membership (yes) | 0 (0.0) | 0 (0.0) |  |  |  |  |
| ESCS = Index of Economic, Social and Cultural Status. PISA WLE index: item response theory–based composite measures standardised to a mean of 0 and a standard deviation of 1 in the international PISA population. SD: Standard deviation. School‑ and country‑level characteristics are presented as student‑weighted distributions and therefore reflect the proportion of students attending schools with these characteristics or residing in countries with these characteristics, rather than characteristics of schools or countries per se. | | | | | | |

| **Supplementary Table 2.** Associations between immigrant origin, COVID‑19‑related school closures, and psychosomatic symptoms. PISA 2022 (N= 88,430 students; 4,203 schools; 13 countries). | | | | | | | | | |
| --- | --- | --- | --- | --- | --- | --- | --- | --- | --- |
|  | **Psychosomatic symptoms** | | | | | | | | |
|  | **Null model** | **Model 1** | | **Model 2** | | **Model 3** | | **Model 4** | |
|  |  | **b (CI95%)** | **p-value** | **b (CI95%)** | **p-value** | **b (CI95%)** | **p-value** | **b (CI95%)** | **p-value** |
| *Student-level (Level 1)* |  |  |  |  |  |  |  |  |  |
| Immigrant background (ref. Native-born) |  |  |  |  |  |  |  |  |  |
| 1st generation | — | -0.057 (-0.087; -0.027) | <0.001 | -0.048 (-0.077; -0.018) | 0.001 | -0.048 (-0.077; -0.018) | 0.001 | -0.029 (-0.062; 0.004) | 0.081 |
| 2nd generation | — | 0.027 (0.002; 0.051) | 0.033 | 0.030 (0.006; 0.055) | 0.015 | 0.030 (0.006; 0.055) | 0.015 | 0.032 (0.005; 0.059) | 0.021 |
| Sex (female) | — | 0.619 (0.603; 0.635) | <0.001 | 0.631 (0.616; 0.647) | <0.001 | 0.631 (0.616; 0.647) | <0.001 | 0.631 (0.616; 0.647) | <0.001 |
| Age (in years) | — | -0.015 (-0.039; 0.008) | 0.195 | -0.019 (-0.043; 0.004) | 0.103 | -0.019 (-0.043; 0.004) | 0.103 | -0.020 (-0.043; 0.004) | 0.101 |
| ESCS (PISA WLE index) | — | 0.027 (0.019; 0.035) | <0.001 | 0.027 (0.019; 0.036) | <0.001 | 0.027 (0.019; 0.036) | <0.001 | 0.027 (0.019; 0.036) | <0.001 |
| Grade repetition (yes) | — | 0.101 (0.077; 0.125) | <0.001 | 0.098 (0.074; 0.121) | <0.001 | 0.098 (0.074; 0.121) | <0.001 | 0.097 (0.073; 0.121) | <0.001 |
| Language spoken at home (language of the test country; yes) | — | -0.007 (-0.031; 0.017) | 0.588 | -0.002 (-0.025; 0.022) | 0.889 | -0.002 (-0.025; 0.022) | 0.889 | -0.002 (-0.026; 0.022) | 0.872 |
| *School-level (Level 2)* |  |  |  |  |  |  |  |  |  |
| COVID-19 school closure (yes) | — | — | — | 0.117 (0.102; 0.133) | <0.001 | 0.117 (0.102; 0.133) | <0.001 | 0.125 (0.106; 0.143) | <0.001 |
| Teacher support (PISA WLE index) | — | — | — | -0.066 (-0.089; -0.043) | <0.001 | -0.066 (-0.089; -0.043) | <0.001 | -0.066 (-0.089; -0.043) | <0.001 |
| Disciplinary climate (PISA WLE index) | — | — | — | -0.112 (-0.137; -0.088) | <0.001 | -0.112 (-0.137; -0.088) | <0.001 | -0.112 (-0.137; -0.087) | <0.001 |
| *Country-level (Level 3)* |  |  |  |  |  |  |  |  |  |
| OECD membership (yes) | — | — | — | — | — | -0.152 (-0.176; -0.127) | <0.001 | -0.153 (-0.178; -0.128) | <0.001 |
| *Interaction terms* |  |  |  |  |  |  |  |  |  |
| Immigrant background (ref. Native-born) × COVID-19 school closure |  |  |  |  |  |  |  |  |  |
| 1st generation × COVID closure (yes) | **—** | — | — | — | — | — | — | -0.049 (-0.094; -0.003) | 0.038 |
| 2nd generation × COVID closure (yes) | **—** | — | — | — | — | — | — | -0.006 (-0.052; 0.041) | 0.816 |
| ICC (%) school | 5.9% | 2.7% | | 2.4% | | 2.3% | | 2.3% | |
| All models are three‑level multilevel linear regression models with students nested within schools and schools nested within countries. Student‑level (Level 1) variables include immigrant background, sex, age, economic, social and cultural status (ESCS), grade repetition, and language spoken at home. School‑level (Level 2) variables include COVID‑19‑related school closure, teacher support, and disciplinary climate. Country‑level (Level 3) variable includes OECD membership. Null model: a multilevel model with no predictor. Model 1 includes student‑level variables only. Model 2 includes student‑ and school‑level variables. Model 3 includes student‑, school‑, and country‑level variables. Model 4 additionally includes interaction terms between immigrant background and COVID‑19‑related school closure. ICC: Intraclass correlation coefficient. 95%CI: 95 % confidence interval. | | | | | | | | | |

| **Supplementary Table 3.** Associations between immigrant origin, COVID‑19‑related school closures, and life satisfaction. PISA 2022 (N= 87,832 students; 4,200 schools; 13 countries). | | | | | | | | | |
| --- | --- | --- | --- | --- | --- | --- | --- | --- | --- |
|  | **Life satisfaction** | | | | | | | | |
|  | **Null model** | **Model 1** | | **Model 2** | | **Model 3** | | **Model 4** | |
|  |  | **b (CI95%)** | **p-value** | **b (CI95%)** | **p-value** | **b (CI95%)** | **p-value** | **b (CI95%)** | **p-value** |
| *Student-level (Level 1)* |  |  |  |  |  |  |  |  |  |
| Immigrant background (ref. Native-born) |  |  |  |  |  |  |  |  |  |
| 1st generation | — | -0.074 (-0.110; -0.037) | <0.001 | -0.096 (-0.130; -0.061) | <0.001 | -0.096 (-0.130; -0.061) | <0.001 | -0.081 (-0.117; -0.045) | <0.001 |
| 2nd generation |  | -0.110 (-0.139; -0.080) | <0.001 | -0.119 (-0.148; -0.091) | <0.001 | -0.119 (-0.148; -0.091) | <0.001 | -0.080 (-0.110; -0.051) | <0.001 |
| Sex (female) | — | -0.225 (-0.243; -0.206) | <0.001 | -0.246 (-0.263; -0.229) | <0.001 | -0.246 (-0.263; -0.229) | <0.001 | -0.246 (-0.263; -0.229) | <0.001 |
| Age (in years) | — | 0.012 (-0.014; 0.038) | 0.366 | 0.013 (-0.013; 0.038) | 0.330 | 0.013 (-0.013; 0.038) | 0.330 | 0.012 (-0.014; 0.038) | 0.359 |
| ESCS (PISA WLE index) | — | 0.061 (0.052; 0.071) | <0.001 | 0.061 (0.052; 0.070) | <0.001 | 0.061 (0.052; 0.070) | <0.001 | 0.061 (0.052; 0.070) | <0.001 |
| Grade repetition (yes) | — | -0.117 (-0.144; -0.090) | <0.001 | -0.110 (-0.137; -0.084) | <0.001 | -0.110 (-0.137; -0.084) | <0.001 | -0.111 (-0.137; -0.085) | <0.001 |
| Language spoken at home (language of the test country; yes) | — | 0.117 (0.089; 0.145) | <0.001 | 0.108 (0.081; 0.135) | <0.001 | 0.108 (0.081; 0.135) | <0.001 | 0.105 (0.078; 0.133) | <0.001 |
| *School-level (Level 2)* |  |  |  |  |  |  |  |  |  |
| COVID-19 school closure (yes) | — | — | — | 0.007 (-0.011; 0.025) | 0.448 | 0.007 (-0.011; 0.025) | 0.448 | 0.028 (0.008; 0.048) | 0.007 |
| Teacher support (PISA WLE index) | — | — | — | 0.223 (0.194; 0.252) | <0.001 | 0.223 (0.194; 0.252) | <0.001 | 0.222 (0.193; 0.251) | <0.001 |
| Disciplinary climate (PISA WLE index) | — | — | — | 0.150 (0.121; 0.179) | <0.001 | 0.150 (0.121; 0.179) | <0.001 | 0.150 (0.121; 0.179) | <0.001 |
| *Country-level (Level 3)* |  |  |  |  |  |  |  |  |  |
| OECD membership (yes) | — | — | — | — | — | -0.163 (-0.197; -0.130) | <0.001 | -0.168 (-0.201; -0.134) | <0.001 |
| *Interaction terms* |  |  |  |  |  |  |  |  |  |
| Immigrant background (ref. Native-born) × COVID-19 school closure |  |  |  |  |  |  |  |  |  |
| 1st generation × COVID closure (yes) | **—** | **—** |  | — |  | — |  | -0.049 (-0.101; 0.003) | 0.067 |
| 2nd generation × COVID closure (yes) | **—** | **—** |  | — |  | — |  | -0.126 (-0.176; -0.076) | <0.001 |
| ICC (%) school | 7.2% | 4.0% | | 2.9% | | 2.9% | | 2.9% | |
| All models are three‑level multilevel linear regression models with students nested within schools and schools nested within countries. Student‑level (Level 1) variables include immigrant background, sex, age, economic, social and cultural status (ESCS), grade repetition, and language spoken at home. School‑level (Level 2) variables include COVID‑19‑related school closure, teacher support, and disciplinary climate. Country‑level (Level 3) variable includes OECD membership. Null model: a multilevel model with no predictor. Model 1 includes student‑level variables only. Model 2 includes student‑ and school‑level variables. Model 3 includes student‑, school‑, and country‑level variables. Model 4 additionally includes interaction terms between immigrant background and COVID‑19‑related school closure. ICC: Intraclass correlation coefficient. 95%CI: 95 % confidence interval. | | | | | | | | | |

| **Supplementary Table 4.** Negative control analysis: associations between immigrant background and school closure due to reasons other than COVID-19 with psychosomatic symptoms. PISA 2022 (N= 88,430 students; 4,203 schools; 13 countries). | | | | | | | | |
| --- | --- | --- | --- | --- | --- | --- | --- | --- |
|  | **Psychosomatic symptoms** | | | | | | | |
|  | **Model 1** | | **Model 2** | | **Model 3** | | **Model 4** | |
|  | **b (CI95%)** | **p-value** | **b (CI95%)** | **p-value** | **b (CI95%)** | **p-value** | **b (CI95%)** | **p-value** |
| *Student-level (Level 1)* |  |  |  |  |  |  |  |  |
| Immigrant background (ref. Native-born) |  |  |  |  |  |  |  |  |
| 1st generation | -0.057 (-0.087; -0.027) | <0.001 | -0.036 (-0.065; -0.006) | 0.017 | -0.036 (-0.065; -0.006) | 0.017 | -0.051 (-0.082; -0.019) | 0.002 |
| 2nd generation | 0.027 ( 0.002; 0.051) | 0.033 | 0.036 ( 0.011; 0.060) | 0.004 | 0.036 ( 0.011; 0.060) | 0.004 | 0.038 ( 0.011; 0.064) | 0.005 |
| Sex (female) | 0.619 ( 0.603; 0.635) | <0.001 | 0.647 ( 0.631; 0.663) | <0.001 | 0.647 ( 0.631; 0.663) | <0.001 | 0.647 ( 0.631; 0.663) | <0.001 |
| Age (in years) | -0.015 (-0.039; 0.008) | 0.195 | -0.014 (-0.037; 0.009) | 0.228 | -0.014 (-0.037; 0.009) | 0.228 | -0.014 (-0.037; 0.009) | 0.230 |
| ESCS (PISA WLE index) | 0.027 ( 0.019; 0.035) | <0.001 | 0.029 ( 0.021; 0.038) | <0.001 | 0.029 ( 0.021; 0.038) | <0.001 | 0.029 ( 0.021; 0.038) | <0.001 |
| Grade repetition (yes) | 0.101 ( 0.077; 0.125) | <0.001 | 0.080 ( 0.056; 0.103) | <0.001 | 0.080 ( 0.056; 0.103) | <0.001 | 0.080 ( 0.056; 0.103) | <0.001 |
| Language spoken at home (language of the test country; yes) | -0.007 (-0.031; 0.017) | 0.588 | -0.010 (-0.033; 0.014) | 0.415 | -0.010 (-0.033; 0.014) | 0.415 | -0.011 (-0.034; 0.013) | 0.370 |
| *School-level (Level 2)* |  |  |  |  |  |  |  |  |
| School closure (other reasons; yes) | — | — | 0.198 ( 0.181; 0.215) | <0.001 | 0.198 ( 0.181; 0.215) | <0.001 | 0.192 ( 0.173; 0.211) | <0.001 |
| Teacher support (PISA WLE index) | — | — | -0.063 (-0.085; -0.040) | <0.001 | -0.063 (-0.085; -0.040) | <0.001 | -0.063 (-0.085; -0.040) | <0.001 |
| Disciplinary climate (PISA WLE index) | — | — | -0.089 (-0.114; -0.065) | <0.001 | -0.089 (-0.114; -0.065) | <0.001 | -0.089 (-0.114; -0.065) | <0.001 |
| *Country-level (Level 3)* |  |  |  |  |  |  |  |  |
| OECD membership (yes) | — | — | — | — | -0.151 (-0.176; -0.127) | <0.001 | -0.152 (-0.177; -0.128) | <0.001 |
| *Interaction terms* |  |  | — | — | — | — |  |  |
| Immigrant background (ref. Native-born) × School closure (other reasons) |  |  |  |  |  |  |  |  |
| 1st generation × other closure (yes) | — | — | — | — | — | — | 0.064 ( 0.009; 0.119) | 0.022 |
| 2nd generation × other closure (yes) | — | — | — | — | — | — | -0.012 (-0.062; 0.039) | 0.649 |
| ICC (%) school | 2.7% | | 2.4% | | 2.3% | | 2.3% | |
| Negative control analysis: the COVID-19-related school closure item is replaced by school closure due to other reasons (natural disasters, strikes, pollution) All models are three‑level multilevel linear regression models with students nested within schools and schools nested within countries. Student‑level (Level 1) variables include immigrant background, sex, age, economic, social and cultural status (ESCS), grade repetition, and language spoken at home. School‑level (Level 2) variables include COVID‑19‑related school closure, teacher support, and disciplinary climate. Country‑level (Level 3) variable includes OECD membership. Null model: a multilevel model with no predictor. Model 1 includes student‑level variables only. Model 2 includes student‑ and school‑level variables. Model 3 includes student‑, school‑, and country‑level variables. Model 4 additionally includes interaction terms between immigrant background and COVID‑19‑related school closure. ICC: Intraclass correlation coefficient. 95%CI: 95 % confidence interval. | | | | | | | | |

| **Supplementary Table 5.** Negative control analysis: associations between immigrant background and school closure due to reasons other than COVID-19 with life satisfaction. PISA 2022 (N= 87,832 students; 4,200 schools; 13 countries). | | | | | | | | |
| --- | --- | --- | --- | --- | --- | --- | --- | --- |
|  | **Life satisfaction** | | | | | | | |
|  | **Model 1** | | **Model 2** | | **Model 3** | | **Model 4** | |
|  | **b (CI95%)** | **p-value** | **b (CI95%)** | **p-value** | **b (CI95%)** | **p-value** | **b (CI95%)** | **p-value** |
| *Student-level (Level 1)* |  |  |  |  |  |  |  |  |
| Immigrant background (ref. Native-born) |  |  |  |  |  |  |  |  |
| 1st generation | -0.074 (-0.110; -0.037) | <0.001 | -0.102 (-0.136; -0.067) | <0.001 | -0.102 (-0.136; -0.067) | <0.001 | -0.103 (-0.141; -0.066) | <0.001 |
| 2nd generation | -0.110 (-0.139; -0.080) | <0.001 | -0.122 (-0.150; -0.093) | <0.001 | -0.122 (-0.150; -0.093) | <0.001 | -0.127 (-0.158; -0.096) | <0.001 |
| Sex (female) | -0.225 (-0.243; -0.206) | <0.001 | -0.255 (-0.272; -0.238) | <0.001 | -0.255 (-0.272; -0.238) | <0.001 | -0.255 (-0.272; -0.238) | <0.001 |
| Age (in years) | 0.012 (-0.014; 0.038) | 0.366 | 0.012 (-0.013; 0.038) | 0.352 | 0.012 (-0.013; 0.038) | 0.352 | 0.012 (-0.013; 0.038) | 0.353 |
| ESCS (PISA WLE index) | 0.061 ( 0.052; 0.071) | <0.001 | 0.061 ( 0.052; 0.070) | <0.001 | 0.061 ( 0.052; 0.070) | <0.001 | 0.061 ( 0.052; 0.070) | <0.001 |
| Grade repetition (yes) | -0.117 (-0.144; -0.090) | <0.001 | -0.100 (-0.127; -0.074) | <0.001 | -0.100 (-0.127; -0.074) | <0.001 | -0.101 (-0.127; -0.074) | <0.001 |
| Language spoken at home (language of the test country; yes) | 0.117 ( 0.089; 0.145) | <0.001 | 0.112 ( 0.085; 0.139) | <0.001 | 0.112 ( 0.085; 0.139) | <0.001 | 0.111 ( 0.084; 0.138) | <0.001 |
| *School-level (Level 2)* |  |  |  |  |  |  |  |  |
| School closure (other reasons; yes) | — | — | -0.121 (-0.139; -0.103) | <0.001 | -0.121 (-0.139; -0.103) | <0.001 | -0.124 (-0.144; -0.104) | <0.001 |
| Teacher support (PISA WLE index) | — | — | 0.221 ( 0.192; 0.250) | <0.001 | 0.221 ( 0.192; 0.250) | <0.001 | 0.221 ( 0.192; 0.250) | <0.001 |
| Disciplinary climate (PISA WLE index) | — | — | 0.138 ( 0.109; 0.166) | <0.001 | 0.138 ( 0.109; 0.166) | <0.001 | 0.137 ( 0.109; 0.166) | <0.001 |
| *Country-level (Level 3)* |  |  |  |  |  |  |  |  |
| OECD membership (yes) | — | — |  |  | -0.178 (-0.211; -0.145) | <0.001 | -0.178 (-0.212; -0.145) | <0.001 |
| *Interaction terms* |  |  |  |  |  |  |  |  |
| Immigrant background (ref. Native-born) × School closure (other reasons) |  |  |  |  |  |  |  |  |
| 1st generation × other closure (yes) | **—** |  |  |  |  |  | 0.005 (-0.055; 0.066) | 0.860 |
| 2nd generation × other closure (yes) | **—** |  |  |  |  |  | 0.020 (-0.035; 0.075) | 0.468 |
| ICC (%) school | 4.0% | | 2.9% | | 2.9% | | 2.9% | |
| Negative control analysis: the COVID-19-related school closure item is replaced by school closure due to other reasons (natural disasters, strikes, pollution) All models are three‑level multilevel linear regression models with students nested within schools and schools nested within countries. Student‑level (Level 1) variables include immigrant background, sex, age, economic, social and cultural status (ESCS), grade repetition, and language spoken at home. School‑level (Level 2) variables include COVID‑19‑related school closure, teacher support, and disciplinary climate. Country‑level (Level 3) variable includes OECD membership. Null model: a multilevel model with no predictor. Model 1 includes student‑level variables only. Model 2 includes student‑ and school‑level variables. Model 3 includes student‑, school‑, and country‑level variables. Model 4 additionally includes interaction terms between immigrant background and COVID‑19‑related school closure. ICC: Intraclass correlation coefficient. 95%CI: 95 % confidence interval. | | | | | | | | |

| **Supplementary Table 6.** Sensitivity analyses: associations between immigrant origin and school closure duration (UNESCO administrative data) with psychosomatic symptoms and life satisfaction. PISA 2022. | | | | | | | | |
| --- | --- | --- | --- | --- | --- | --- | --- | --- |
|  | **Psychosomatic symptoms**  **(N= 88,430 students; 4,203 schools; 13 countries)** | | | | **Life satisfaction**  **(N= 87,832 students; 4,200 schools; 13 countries)** | | | |
|  | **Model 1** | | **Model 2** | | **Model 1** | | **Model 2** | |
|  | **b (95% CI)** | **p-value** | **b (95% CI)** | **p-value** | **b (95% CI)** | **p-value** | **b (95% CI)** | **p-value** |
| Immigrant background (ref. Native-born) |  |  |  |  |  |  |  |  |
| 1st generation | -0.050 (-0.080; -0.019) | 0.001 | -0.037(-0.072; -0.002) | 0.038 | -0.104 (-0.140; -0.068) | <0.001 | -0.098 (-0.138; -0.058) | <0.001 |
| 2nd generation | 0.021 (-0.008; 0.049) | 0.150 | 0.017 (-0.016; 0.049) | 0.312 | -0.143 (-0.178; -0.108) | <0.001 | -0.103 (-0.142; -0.065) | <0.001 |
| School closure exposure |  |  |  |  |  |  |  |  |
| UNESCO closure duration (z-score) | 0.089 (0.065; 0.114) | <0.001 | 0.071 (0.047; 0.096) | <0.001 | 0.092 (0.066; 0.119) | <0.001 | 0.090(0.064; 0.117) | <0.001 |
| COVID-19 closure (self-report; yes) | — | — | 0.121 (0.103; 0.140) | <0.001 | — | — | 0.021(0.001; 0.042) | 0.039 |
| Interaction: immigrant background × COVID-19 closure (self-report) |  |  |  |  |  |  |  |  |
| 1st generation × COVID closure | — | — | -0.038 (-0.085; 0.009) | 0.113 | — | — | -0.017 (-0.070; 0.036) | 0.524 |
| 2nd generation × COVID closure | — | — | 0.008 (-0.041; 0.056) | 0.759 | — | — | -0.109(-0.160; -0.058) | <0.001 |
| Interaction: immigrant background × UNESCO closure duration (z-score) |  |  |  |  |  |  |  |  |
| 1st generation × closure days (z) | -0.035 (-0.066; -0.005) | 0.022 | -0.027 (-0.058; 0.004) | 0.089 | -0.077 (-0.111; -0.042) | <0.001 | -0.075 (-0.110; -0.040) | <0.001 |
| 2nd generation × closure days (z) | -0.028 (-0.057; 0.000) | 0.054 | -0.029 (-0.059; 0.001) | 0.056 | -0.061 (-0.096; -0.027) | <0.001 | -0.043 (-0.078; -0.008) | 0.017 |
| All models are three‑level multilevel linear regression models with students nested within schools and schools nested within countries. Student‑level (Level 1) covariates include sex, age, economic, social and cultural status (ESCS), grade repetition, and language spoken at home. School‑level (Level 2) covariates include teacher support, and disciplinary climate. Country‑level (Level 3) covariate includes OECD membership. All models include student-, school-, and country-level covariates. Model 1: UNESCO duration replaces self-reported COVID-19 school closure. Model 2: both exposures included simultaneously. 95%CI: 95 % confidence interval. | | | | | | | | |
